# Supplementary material
Source: PubMed Central journal article supplement (PMC6922056)
Supplement: NIHMS1544968-supplement-13361_2019_2341_MOESM1_ESM.pdf [file NIHMS1544968-supplement-13361_2019_2341_MOESM1_ESM.pdf]

**Supplementary Material for**

**Comprehensive Characterization of Recombinant Catalytic Subunit of cAMP-**

**Dependent Protein Kinase by Top-Down Mass Spectrometry**

Zhijie Wu,<sup>1</sup> Yutong Jin,<sup>1</sup> Bifan Chen,<sup>1</sup> Morgan K. Gugger,<sup>1</sup> Chance L. Wilkinson-Johnson,<sup>1</sup>  
Timothy N. Tiambeng,<sup>1</sup> Song Jin,<sup>1</sup> Ying Ge<sup>1,2,3</sup>

<sup>1</sup>Department of Chemistry, University of Wisconsin-Madison, Madison, WI 53706, USA

<sup>2</sup>Department of Cell and Regenerative Biology, University of Wisconsin-Madison, Madison, WI  
53705, USA

<sup>3</sup>Human Proteomics Program, University of Wisconsin-Madison, Madison, WI 53705, USA

\*To whom correspondence may be addressed: Dr. Ying Ge, Wisconsin Institute for Medical  
Research II, Room 8551, 1111 Highland Ave, Madison, Wisconsin 53705, USA. E-mail:  
ying.ge@wisc.edu; Tel: 608-265-4744; Fax: 608-265-5512.

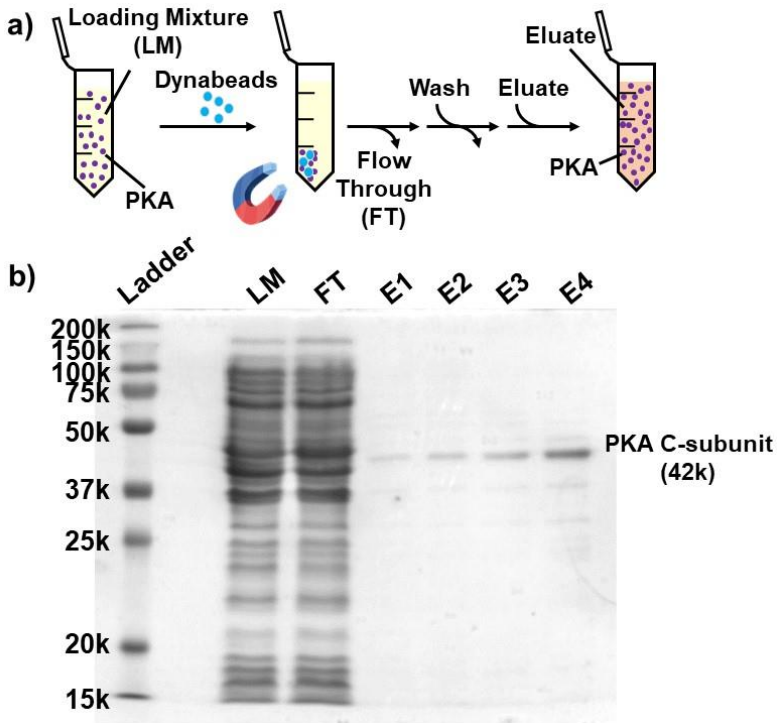

Figure S1. Schematic drawing and SDS-PAGE analysis of affinity purification for PKA C-subunit.  
a) Schematic of the affinity purification of PKA C-subunit using DynaBead for His-tag purification;  
b) SDS-PAGE analysis of purified PKA catalytic subunit expressed in *E. coli*.

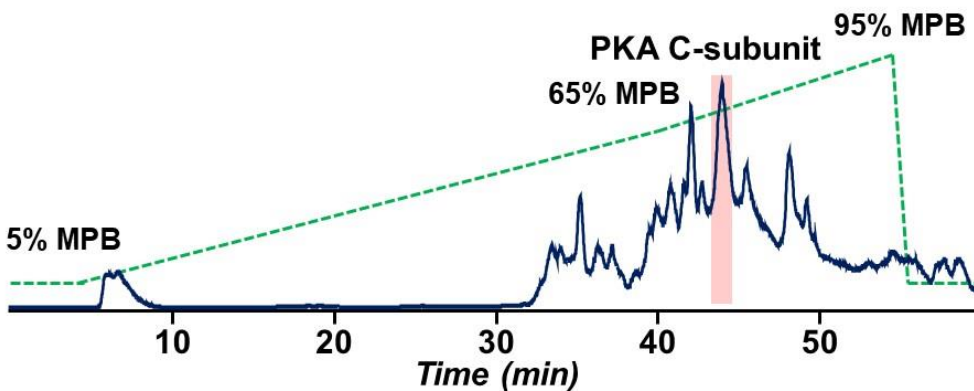

Figure S2. Total ion chromatogram of recombinant PKA C-subunit using liquid chromatography (LC). The LC condition was run with H<sub>2</sub>O with 0.1% formic acid (FA) as mobile phase A and 50:50 EtOH:ACN with 0.1% FA as mobile phase B (MPB). The gradient ran at 5% MPB for 5 min, followed by 5% to 65% MPB from 5 to 40 min, 65% to 95% MPB from 40-53 min, and back to 5% MPB. Other peaks in the chromatogram are either low mass proteins or small molecule contamination.

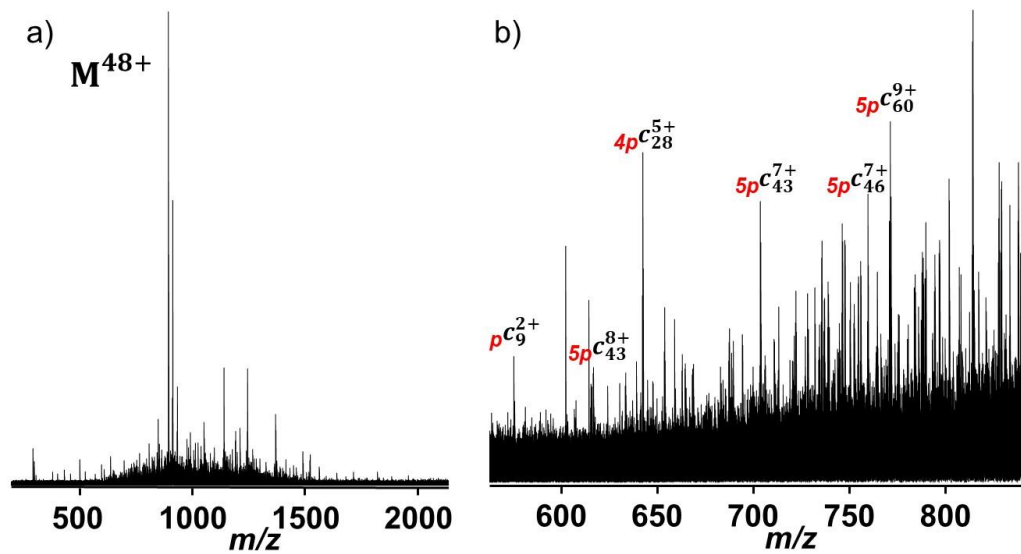

Figure S3. Raw spectra of ECD experiment. a) The precursor ion at charge state  $48^+$  was subject to ECD fragmentation experiment, and a large number of fragment ions was yielded. b) Zoomed-in spectra from 625 – 850  $m/z$  showing several  $c$  ions with phosphorylations intact.

```

1  L G S S H H H H H S S G L V P R G S H M G N A A A 346
26 A K K G S E Q E S V K E F L A K A K E D F L K K W 321
51 E T P S Q N T A Q L D Q F D R I K T L G T G S F G 296
76 R V M L V K H K E S G N H Y A M K I L D K Q K V V 271
101 K L K Q I E H T L N E K R I L Q A V N F P F L V K 246
126 L E F S F K D N S N L Y M V M E Y V A G G E M F S 221
151 H L R R I G R F S E P H A R F Y A A Q I V L T F E 196
176 Y L H S L D L I Y R D L K P E N L L I D Q Q G Y I 171
201 Q V L T D F G F A K R V K G R T W T L C G T P E Y L 146
226 A P E I I L S K G Y N K A V D W W A L G V L I Y E 121
251 M A A G Y P P F L A D Q P I Q I Y E K I V S G K V 96
276 R F P S H F S S D L K D L L R N L L Q V D L T K R 71
301 F G N L K N G V N D I K N H K W F A T T D W I A I 46
326 Y Q R K V E A P F I P K F K G P G D T S N F D D Y 21
351 L E E E E I R V S I N E K C G K E F T E F 1

```

Figure S4. Fragment ion mapping for CID fragmentation. A series of CID fragment ions was observed at Ser[54-58]Gln, Ser[134-145]Gly, Gly[246-265]Gln, and Tyr[350-357]Arg. *b* ions that contain a large number of phosphorylations were observed at Ser[54-58]Gln, Ser[134-145]Gly, and Gly[246-255]Tyr.

```

1  G S S H H H H H H S S G L V P R G S H M G N A A A 346
26 A K K G S E Q E S V K E F L A K A K E D F L K K W 321
51 E T P S Q N T A Q L D Q F D R I K T L G T G S F G 296
76 R V M L V K H K E S G N H Y A M K I L D K Q K V V 271
101 K L K Q I E H T L N E K R I L Q A V N F P F L V K 246
126 L E F S F K D N S N L Y M V M E Y V A G G E M F S 221
151 H L R R I G R F S E P H A R F Y A A Q I V L T F E 196
176 Y L H S L D L I Y R D L K P E N L L I D Q Q G Y I 171
201 Q V T D F G F A K R V K G R T W T L C G T P E Y L 146
226 A P E I I L S K G Y N K A V D W W A L G V L I Y E 121
251 M A A G Y P P F F A D Q P I Q I Y E K I V S G K V 96
276 R F P S H F S S D L K D L L R N L L Q V D L T K R 71
301 F G N L K N G V N D I K N H K W F A T T D W I A I 46
326 Y Q R K V E A P F I P K F K G P G D T S N F D D Y 21
351 E E E E I R V S I N E K C G K E F T E F 1

```

Figure S5. Fragment ion mapping for ECD fragmentation. Most ECD fragment ions were located at both ends of the amino acid sequence.

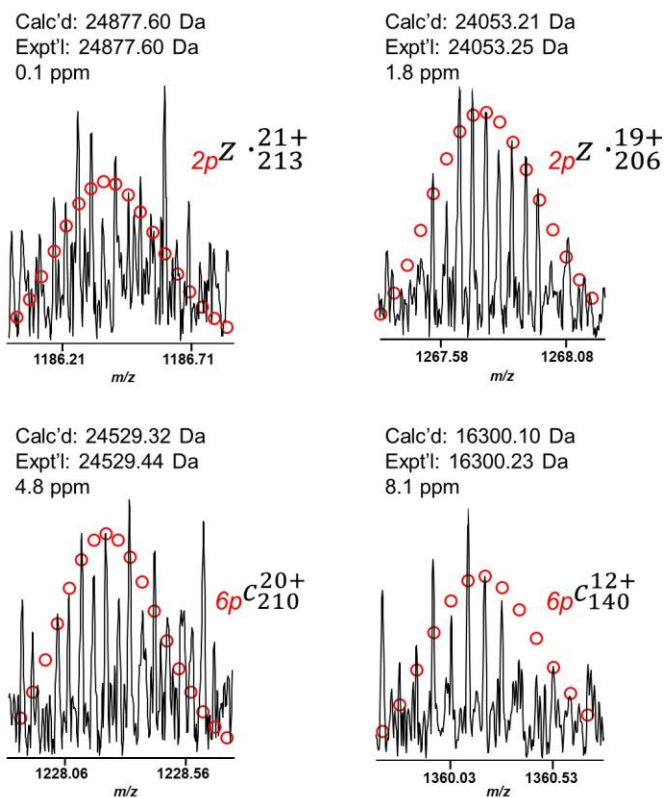

Figure S6. Representative fragment ions from ECD fragmentation. Four ECD fragment ions with large molecular weight were shown.

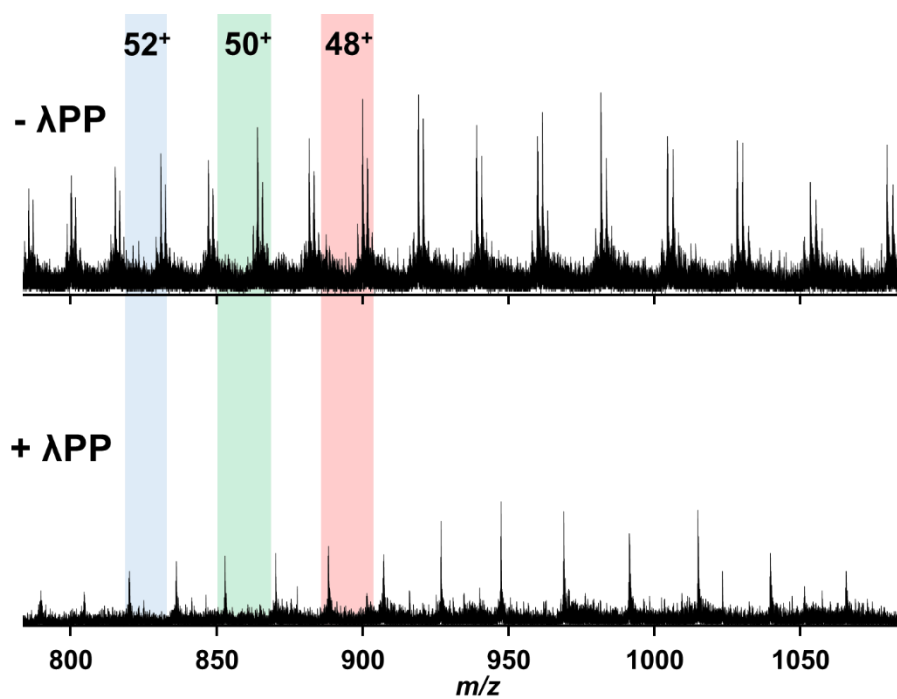

Figure S7. Broadband spectra for the dephosphorylation reaction. A drastic peak shift was observed for charge state  $52^+$ ,  $50^+$ , and  $48^+$  due to the removal of multiple phosphorylations.
